# Supplementary material for: Deciphering the Non-Coding RNA Landscape of Pediatric Acute Myeloid Leukemia
Source: MDPI journal article supplement (doi:10.3390/cancers14092098), 2022-04-22
Supplement: s1 [file s1]

## Overview Supplementary

### Supplemental Material and Methods ..... 2

- Sorting
- Micro-array experimental settings

### Supplemental Figure ..... 3

- Figure S1. Overview of the pre-ranked gene set enrichment analysis (GSEA) of protein-coding genes (anti-)correlated with the six shared DE-lncRNAs, showing their involvement in different hallmark pathways (MSigDB).

### Supplemental References ..... 4

### Supplemental Tables (Excel file: *SupplementalTables.csv*)

- Table S1. Overview of monoclonal antibodies used for membrane staining and sorting
- Table S2. Differential expressed ( $|\log FC| > 2$  and  $\text{Adj.P.Val} \leq 0.05$ ) lncRNAs in LSC compared to HSC
- Table S3. Differential expressed ( $|\log FC| > 2$  and  $\text{Adj.P.Val} \leq 0.05$ ) lncRNAs in L-blast compared to C-blast
- Table S4. Differential expressed ( $|\log FC| > 2$  and  $\text{Adj.P.Val} \leq 0.05$ ) miRNAs in LSC compared to HSC
- Table S5. Differential expressed ( $|\log FC| > 2$  and  $\text{Adj.P.Val} \leq 0.05$ ) miRNAs in L-blast compared to C-blast
- Table S6. Enriched pathways with associated protein-coding genes for the unique upregulated DE-lncRNAs in the LSC fraction
- Table S7. Enriched pathways with associated protein-coding genes for the shared upregulated DE-lncRNAs in the LSC fraction and L-blast

## Supplemental Material and Methods

### *Sorting*

CD34+/CD38+ (n=4) and CD34+/CD38- (n=3) cell fractions, and lymphocytes (n=4), were sorted from four de novo pedAML patients and used for profiling. RNA yield for the CD34+/CD38- fraction (LSC) of pedAML4 was insufficient for micro-array profiling. As control, CD34+/CD38+ (n=3) and CD34+/CD38- (n=2) cells were sorted from cord blood (CB). The patient samples were a priori cryopreserved and thawed by short incubation in a 42°C pre-heated water bath, followed by 30 min incubation at room temperature (RT) in 20 mL RPMI with 20% FCS, 200  $\mu$ L DNase I (1 mg/mL, grade II bovine pancreas) and 200  $\mu$ L MgCl<sub>2</sub> (1 M) (Sigma-Aldrich). After incubation, cells were spinoculated (10 min, 400 rpm) and washed with 15 mL RPMI/20% FCS. The CB samples were sorted using fresh material.

Freshly collected and thawed mononuclear cells (MNCs) were spinoculated (5 min, 1500 rpm). Monoclonal antibodies were added to the cell pellet (mAb, Table S1). After 20 min incubation in the dark at RT, cell pellets were washed with PBS+2% BSA. Next, labeled cells were resuspended in 50% RPMI/50%FCS medium and sorted on a FACSAria III with red, blue, and ultraviolet lasers (BD Biosciences).

All scatters were devoid of cell debris and doublets based on propidium iodide exclusion and FSC-H vs FSC-A plots, respectively. The immature myeloid compartment was defined by CD34, CD45 and scatter properties. CD34-positive cases were identified as those with >1% of CD34+ blasts in the leukemic CD45low/SSClow compartment [1, 2]. CD34+/CD38+ blasts and CD34+/CD38- stem cells were gated as previously described [3]. Lymphocytes and fluorescence-minus-one (FMO) controls were used to determine expression cut-offs for CD38 and LSC aberrant markers. Delineated cell populations were backgated on FSC-A/SSC-A and CD45/SSC-A scatter plots to exclude non-specific events and assure homogeneous scatters.

### *Micro-array experimental settings*

Total RNA was extracted from sorted cells, resuspended in TRIzol, using the miRNeasy Mini Kit (Qiagen) in combination with on-column DNase I digestion (RNase-Free DNase set, Qiagen) according to manufacturer's instructions. RNA quality and concentrations were measured by Agilent 2100 Bioanalyzer (Agilent) and Qubit (ThermoFisher Scientific), respectively. Mean RNA integrity number of all sorted fractions was 9.3 (range 8.6 – 9.9). Three LSC and four L-blast fractions from pedAML patients were profiled. The LSC fraction for one pedAML patient is lacking, as the RNA fraction experienced a technical issue during profiling. Two HSC and three C-blast fractions from healthy controls were profiled. The RNA yield from one HSC fraction appeared to be too low during the experiment, and was therefore excluded.

Profiling was performed by Biogazelle using a custom 8x60K human Gene expression micro-array (Agilent), containing probes for 33178 human protein-coding genes. To this end, 20 ng RNA was preamplified using the Complete Whole Transcriptome Amplification Kit (Sigma-Aldrich). Amplified RNA was subsequently labelled using the Genomic DNA ULS Labeling Kit (Agilent) and hybridized to the array in combination with CGH blocking to reduce background signaling. Micro-arrays were analyzed using an Agilent micro-array scanner and Feature Extraction software (v12.0). Probe intensities were background subtracted, quantile-normalized and log<sub>2</sub>-based probe intensities were calculated. A target was present if the log<sub>2</sub> expression value exceeded the cut-off set at 6.75, based on the dark corner control probe value plus 1. Raw micro-array data are available under the accession number GSE 128103 (released on March 9, 2022).

Data processing of the GSE 128103 dataset was performed in R using the limma package (R Bioconductor). If a gene was represented by multiple probes, the highest expression was selected. Differential expression analyses were performed between LSC and HSC, and L-blast and C-blast, using the limma package (R Bioconductor).

## Supplemental Figure

|                                 | lnc-GSG1-1 |        | lnc-KMT2E-1 |        | lnc-RGMA-1 |        | LINC00649 |        | LINC01220 |        | lnc-LYST-4 |        |
|---------------------------------|------------|--------|-------------|--------|------------|--------|-----------|--------|-----------|--------|------------|--------|
|                                 | Enriched   | FDR    | Enriched    | FDR    | Enriched   | FDR    | Enriched  | FDR    | Enriched  | FDR    | Enriched   | FDR    |
| ADIPOGENESIS                    |            |        | +           | 0.031  | +          | 0.014  | +         | 0.007  | +         | 0.015  | +          | 0.043  |
| ANDROGEN RESPONSE               | +          | 0.003  | +           | 0.006  | +          | 0.006  | +         | 0.020  | +         | 0.013  | +          | 0.006  |
| APOPTOSIS                       | +          | 0.002  | +           | 0.001  | +          | <0.001 | +         | 0.006  | +         | 0.002  | +          | 0.002  |
| CHOLESTEROL HOMEOSTASIS         |            |        |             |        |            |        |           |        | +         | 0.045  | +          | 0.039  |
| COAGULATION                     | +          | 0.049  | +           | 0.083  |            |        |           |        |           |        |            |        |
| DNA REPAIR                      | +          | 0.034  | +           | 0.029  | +          | 0.066  | +         | 0.005  | +         | 0.007  | +          | 0.022  |
| ESTROGEN RESPONSE LATE          |            |        |             |        |            |        |           |        |           |        | +          | 0.04   |
| FATTY ACID METABOLISM           |            |        |             |        | +          | 0.021  |           |        | +         | 0.077  |            |        |
| GLYCOLYSIS                      |            |        |             |        |            |        |           |        |           |        | +          | 0.048  |
| HEME METABOLISM                 |            |        | +           | 0.082  |            |        |           |        | +         | 0.028  |            |        |
| HYPOXIA                         | +          | 0.001  | +           | 0.007  | +          | 0.002  | +         | <0.001 | +         | <0.001 | +          | <0.001 |
| IL2 STAT5 SIGNALING             | +          | 0.011  | +           | 0.015  | +          | 0.026  | +         | 0.014  | +         | 0.006  | +          | 0.003  |
| INFLAMMATORY RESPONSE           | +          | 0.012  | +           | 0.006  |            |        | +         | 0.007  | +         | 0.010  |            |        |
| INTERFERON GAMMA RESPONSE       |            |        | +           | 0.085  |            |        | +         | 0.054  |           |        | +          | 0.052  |
| MTORC1 SIGNALING                | +          | <0.001 | +           | <0.001 | +          | <0.001 | +         | <0.001 | +         | <0.001 | +          | <0.001 |
| MYC TARGETS V1                  |            |        |             |        | +          | 0.062  |           |        | +         | 0.014  | +          | <0.001 |
| OXIDATIVE PHOSPHORYLATION       | +          | <0.001 | +           | <0.001 | +          | <0.001 | +         | <0.001 | +         | <0.001 | +          | <0.001 |
| P53 PATHWAY                     | +          | 0.004  | +           | 0.007  | +          | 0.011  | +         | 0.039  | +         | 0.022  | +          | 0.062  |
| PI3K AKT MTOR SIGNALING         |            |        |             |        |            |        |           |        |           |        | +          | 0.065  |
| PROTEIN SECRETION               |            |        |             |        |            |        |           |        | +         | 0.074  | +          | 0.031  |
| REACTIVE OXYGEN SPECIES PATHWAY | +          | 0.004  | +           | 0.016  | +          | 0.012  | +         | 0.007  | +         | 0.006  | +          | 0.013  |
| TGF BETA SIGNALING              | +          | 0.072  | +           | 0.023  | +          | 0.022  | +         | 0.051  | +         | 0.009  | +          | 0.037  |
| TNFA SIGNALING VIA NFKB         | +          | <0.001 | +           | <0.001 | +          | <0.001 | +         | <0.001 | +         | <0.001 | +          | <0.001 |
| UNFOLDED PROTEIN RESPONSE       |            |        |             |        |            |        |           |        | +         | 0.047  | +          | 0.044  |
| UV RESPONSE UP                  | +          | 0.036  | +           | 0.027  | +          | 0.005  | +         | 0.015  | +         | 0.005  | +          | 0.006  |
| ALLOGRAFT REJECTION             | -          | 0.094  |             |        |            |        |           |        |           |        |            |        |
| APOPTOSIS                       |            |        |             |        | -          | 0.091  |           |        |           |        |            |        |
| DNA REPAIR                      | -          | 0.006  | -           | 0.020  | -          | 0.050  |           |        | -         | 0.039  |            |        |
| E2F TARGETS                     |            |        | -           | 0.020  | -          | 0.042  | -         | 0.009  | -         | 0.035  | -          | 0.094  |
| G2M CHECKPOINT                  | -          | 0.001  | -           | 0.023  | -          | 0.002  | -         | <0.001 | -         | 0.001  | -          | 0.014  |
| MTORC1 SIGNALING                |            |        |             |        | -          | 0.054  | -         | 0.089  |           |        |            |        |
| MYC TARGETS V1                  | -          | <0.001 | -           | <0.001 | -          | <0.001 | -         | <0.001 | -         | <0.001 | -          | <0.001 |
| NOTCH SIGNALING                 |            |        |             |        | -          | 0.088  |           |        |           |        |            |        |

**Figure S1.** Overview of the pre-ranked gene set enrichment analysis (GSEA) of protein-coding genes (anti-)correlated with the 6 shared DE-lncRNAs, showing their involvement in different hallmark pathways (MSigDB).

## Supplemental references

1. Kersten, B.; Valkering, M.; Wouters, R.; van Amerongen, R.; Hanekamp, D.; Kwidama, Z.; Valk, P.; Ossenkoppele, G.; Zeijlemaker, W.; Kaspers, G.; et al. CD45RA, a specific marker for leukaemia stem cell subpopulations in acute myeloid leukaemia. *Br. J. Haematol.* **2016**, *173*, 219–235.
2. Zeijlemaker, W.; Kelder, A.; Wouters, R.; Valk, P.J.; Witte, B.I.; Cloos, J.; Ossenkoppele, G.J.; Schuurhuis, G.J. Absence of leukaemic CD34 cells in acute myeloid leukaemia is of high prognostic value: a longstanding controversy deciphered. *Br. J. Haematol.* **2015**, *171*, 227–238.
3. Zeijlemaker, W.; Kelder, A.; Oussoren-Brockhoff, Y.J.; Scholten, W.J.; Snel, A.N.; Veldhuizen, D.; Cloos, J.; Ossenkoppele, G.J.; Schuurhuis, G.J. A simple one-tube assay for immunophenotypical quantification of leukemic stem cells in acute myeloid leukemia. *Leukemia* **2016**, *30*, 439–446.
