# Supplementary material for: Deciphering the Non-Coding RNA Landscape of Pediatric Acute Myeloid Leukemia
Source: Cancers (Basel). 2022 Apr 22;14(9):2098. doi: 10.3390/cancers14092098 (PMC9100904; doi:10.3390/cancers14092098)
Supplement: Supplementary file 1 [file cancers-14-02098-s001.zip › SupplementalTables.xlsx]

## Sheet: Table S1
Antibody	Fluorochrome	Clone	Supplier	Category no.
CD34	PerCP-Cy5.5	8G12	BD biosciences	333146
CD38	APC-H7	HB7	BD biosciences	656646
CD45	PacO	HI30	Invitrogen	MHCD4530

## Sheet: Table S2
Probe_ID	Gene_ID	Transcript_ID	logFC	Adj.P.Val
PVD_LNCIPEDIA_2013_7311	lnc-GSG1-1	lnc-GSG1-1:1	5.66	0.0139
PVD_LNCIPEDIA_2013_13102	lnc-RNFT2-1	lnc-RNFT2-1:3	5.17	0.0416
PVD_LNCIPEDIA_2013_23031	lnc-RGMA-1	lnc-RGMA-1:1	4.88	0.0293
PVD_LNCIPEDIA_2013_20744	lnc-GSG1-1	lnc-GSG1-1:1	4.77	0.0171
PVD_LNCIPEDIA_2013_8971	lnc-KMT2E-1	lnc-KMT2E-1:10	4.44	0.0171
A_24_P927716	lnc-CENPU-1	lnc-CENPU-1:1	4.2	0.0398
A_23_P429998	lnc-FOSB-1	lnc-FOSB-1:1	4.18	0.0442
PVD_LNCIPEDIA_2013_6482	LINC01220	LINC01220:10	4.14	0.0484
PVD_LNCIPEDIA_2013_11894	lnc-PLD1-2	lnc-PLD1-2:1	3.53	0.0416
A_23_P134851	lnc-GFRA2-4	lnc-GFRA2-4:1	3.37	0.0431
PVD_LNCIPEDIA_2013_8225	LINC00649	LINC00649:11	3.1	0.0416
PVD_LNCIPEDIA_2013_23873	lnc-CHST2-2	lnc-CHST2-2:1	3.01	0.0416
PVD_LNCIPEDIA_2013_13128	lnc-ROM1-3	lnc-ROM1-3:1	2.94	0.0398
PVD_LNCIPEDIA_2013_3932	lnc-CHST2-2	lnc-CHST2-2:1	2.82	0.0455
A_33_P3416142	lnc-ATP6V1G3-4	lnc-ATP6V1G3-4:12	2.79	0.0293
A_33_P3352213	lnc-EPS15L1-3	lnc-EPS15L1-3:1	2.78	0.0455
A_23_P63798	lnc-KLF6-8	lnc-KLF6-8:2	2.62	0.0416
PVD_LNCIPEDIA_2013_8345	lnc-KBTBD6-1	lnc-KBTBD6-1:1	2.56	0.042
PVD_LNCIPEDIA_2013_19107	lnc-KLHL25-4	lnc-KLHL25-4:1	2.54	0.0327
PVD_LNCIPEDIA_2013_1706	lnc-ATP6V1G3-4	lnc-ATP6V1G3-4:10	2.43	0.0416
PVD_LNCIPEDIA_2013_10608	lnc-LYST-4	lnc-LYST-4:1	2.27	0.0455
PVD_LNCIPEDIA_2013_14671	lnc-SLC39A10-3	lnc-SLC39A10-3:1	2.26	0.0478
PVD_LNCIPEDIA_2013_20654	lnc-KLHL25-6	lnc-KLHL25-6:1	2.14	0.0489
A_24_P177948	lnc-TBX20-3	lnc-TBX20-3:2	-2.02	0.0484
PVD_LNCIPEDIA_2013_2414	lnc-C17orf58-2	lnc-C17orf58-2:1	-2.04	0.0484
PVD_LNCIPEDIA_2013_4781	lnc-DALRD3-1	lnc-DALRD3-1:1	-2.06	0.0461
A_32_P42537	lnc-FAM236B-4	lnc-FAM236B-4:1	-2.08	0.0458
A_33_P3318053	lnc-LINC02210-CRHR1-52	lnc-LINC02210-CRHR1-52:15	-2.08	0.0484
PVD_LNCIPEDIA_2013_19552	lnc-CCDC182-1	lnc-CCDC182-1:1	-2.09	0.0461
PVD_LNCIPEDIA_2013_2416	lnc-C17orf58-4	lnc-C17orf58-4:1	-2.19	0.0398
PVD_LNCIPEDIA_2013_15410	lnc-STK17A-1	lnc-STK17A-1:1	-2.21	0.0484
PVD_LNCIPEDIA_2013_683	lnc-RBM11-3	lnc-RBM11-3:2	-2.23	0.0416
PVD_LNCIPEDIA_2013_17343	lnc-VSIG10-1	lnc-VSIG10-1:1	-2.26	0.0458
PVD_LNCIPEDIA_2013_5369	lnc-CAND1-3	lnc-CAND1-3:2	-2.34	0.0416
A_33_P3735771	DANT2	DANT2:1	-2.36	0.0431
PVD_LNCIPEDIA_2013_6658	lnc-TTC14-1	lnc-TTC14-1:6	-2.37	0.0377
PVD_LNCIPEDIA_2013_16239	LINC01794	LINC01794:11	-2.38	0.0377
PVD_LNCIPEDIA_2013_5893	lnc-RPH3AL-1	lnc-RPH3AL-1:5	-2.39	0.0416
PVD_LNCIPEDIA_2013_22281	lnc-RPL26L1-1	lnc-RPL26L1-1:1	-2.4	0.0416
PVD_LNCIPEDIA_2013_22869	lnc-SLC25A29-1	lnc-SLC25A29-1:1	-2.4	0.0484
PVD_LNCIPEDIA_2013_20890	lnc-CGGBP1-1	lnc-CGGBP1-1:1	-2.41	0.0416
PVD_LNCIPEDIA_2013_21894	WWC3-AS1	WWC3-AS1:1	-2.41	0.0455
PVD_LNCIPEDIA_2013_1882	lnc-BCL9L-2	lnc-BCL9L-2:1	-2.42	0.0416
PVD_LNCIPEDIA_2013_14366	lnc-SHF-2	lnc-SHF-2:1	-2.48	0.0416
A_23_P53663	lnc-PPP1R12A-2	lnc-PPP1R12A-2:1	-2.48	0.0441
PVD_LNCIPEDIA_2013_19734	lnc-HNRNPA2B1-15	lnc-HNRNPA2B1-15:1	-2.52	0.0484
A_23_P375147	lnc-RC3H2-1	lnc-RC3H2-1:1	-2.57	0.0426
PVD_LNCIPEDIA_2013_14848	lnc-SMARCA5-4	lnc-SMARCA5-4:7	-2.61	0.0463
PVD_LNCIPEDIA_2013_10410	lnc-NCDN-1	lnc-NCDN-1:1	-2.61	0.0416
A_23_P387585	FAM226B	FAM226B:5	-2.62	0.0476
A_33_P3332581	lnc-SERPINI1-17	lnc-SERPINI1-17:1	-2.64	0.0416
A_33_P3247392	lnc-CSNK1E-1	lnc-CSNK1E-1:1	-2.68	0.0343
PVD_LNCIPEDIA_2013_13721	lnc-RPL26L1-1	lnc-RPL26L1-1:1	-2.69	0.0461
PVD_LNCIPEDIA_2013_23585	lnc-ZCCHC9-1	lnc-ZCCHC9-1:1	-2.73	0.0328
PVD_LNCIPEDIA_2013_5099	lnc-DLK1-35	lnc-DLK1-35:13	-2.76	0.0484
A_24_P214552	LINC01565	LINC01565:1	-2.81	0.0293
A_33_P3227944	lnc-LINC02210-CRHR1-52	lnc-LINC02210-CRHR1-52:14	-2.84	0.0474
PVD_LNCIPEDIA_2013_10969	LINC01284	LINC01284:10	-2.87	0.0293
PVD_LNCIPEDIA_2013_5324	lnc-DUSP1-4	lnc-DUSP1-4:1	-2.88	0.0294
PVD_LNCIPEDIA_2013_5593	lnc-ELOVL5-2	lnc-ELOVL5-2:1	-2.88	0.0416
A_24_P76300	lnc-ZNF154-1	lnc-ZNF154-1:1	-2.9	0.0294
PVD_LNCIPEDIA_2013_8505	lnc-KHDRBS2-1	lnc-KHDRBS2-1:1	-2.91	0.0293
A_23_P84596	lnc-PROB1-1	lnc-PROB1-1:2	-2.93	0.0393
A_33_P3351290	lnc-PROB1-1	lnc-PROB1-1:1	-2.93	0.0325
PVD_LNCIPEDIA_2013_24240	lnc-WASL-1	lnc-WASL-1:1	-2.95	0.0377
PVD_LNCIPEDIA_2013_15068	lnc-SOX13-1	lnc-SOX13-1:1	-2.95	0.0455
PVD_LNCIPEDIA_2013_5095	lnc-DLK1-35	lnc-DLK1-35:10	-2.96	0.0256
PVD_LNCIPEDIA_2013_5103	lnc-DLK1-35	lnc-DLK1-35:114	-2.97	0.0426
PVD_LNCIPEDIA_2013_2404	lnc-SPATA32-2	lnc-SPATA32-2:1	-2.98	0.0293
A_33_P3258383	lnc-IFT46-1	lnc-IFT46-1:1	-2.99	0.0416
PVD_LNCIPEDIA_2013_19930	lnc-LEMD3-1	lnc-LEMD3-1:1	-3.03	0.0398
A_23_P302568	lnc-SLC5A6-2	lnc-SLC5A6-2:1	-3.08	0.0484
PVD_LNCIPEDIA_2013_496	lnc-ACOT9-2	lnc-ACOT9-2:1	-3.09	0.0426
PVD_LNCIPEDIA_2013_11961	lnc-PML-2	lnc-PML-2:1	-3.09	0.0325
PVD_LNCIPEDIA_2013_2324	PWRN1	PWRN1:12	-3.11	0.0398
PVD_LNCIPEDIA_2013_12239	lnc-PREPL-1	lnc-PREPL-1:1	-3.12	0.0484
PVD_LNCIPEDIA_2013_2044	lnc-BRSK1-1	lnc-BRSK1-1:1	-3.13	0.0484
A_33_P3613516	GATA2-AS1	GATA2-AS1:5	-3.18	0.0416
A_32_P40547	lnc-DLK1-35	lnc-DLK1-35:10	-3.24	0.0327
PVD_LNCIPEDIA_2013_11885	MME-AS1	MME-AS1:1	-3.28	0.0256
PVD_LNCIPEDIA_2013_8935	lnc-LEMD3-1	lnc-LEMD3-1:1	-3.32	0.034
PVD_LNCIPEDIA_2013_3740	lnc-CELF2-2	lnc-CELF2-2:1	-3.33	0.0484
PVD_LNCIPEDIA_2013_23654	LINC02019	LINC02019:6	-3.33	0.0204
PVD_LNCIPEDIA_2013_10841	lnc-NRG1-2	lnc-NRG1-2:1	-3.34	0.0456
PVD_LNCIPEDIA_2013_11960	lnc-PML-1	lnc-PML-1:1	-3.38	0.0293
PVD_LNCIPEDIA_2013_5096	lnc-DLK1-35	lnc-DLK1-35:10	-3.45	0.0197
PVD_LNCIPEDIA_2013_19965	lnc-TOX4-1	lnc-TOX4-1:1	-3.46	0.034
PVD_LNCIPEDIA_2013_724	lnc-AGGF1-2	lnc-AGGF1-2:1	-3.49	0.0416
PVD_LNCIPEDIA_2013_19742	lnc-AGGF1-2	lnc-AGGF1-2:1	-3.51	0.0293
PVD_LNCIPEDIA_2013_1516	lnc-ASB15-1	lnc-ASB15-1:1	-3.58	0.0204
PVD_LNCIPEDIA_2013_10537	lnc-NEK3-1	lnc-NEK3-1:1	-3.59	0.0293
PVD_LNCIPEDIA_2013_9456	lnc-MAP7-1	lnc-MAP7-1:1	-3.66	0.0377
A_23_P386442	KIAA0087	KIAA0087:4	-3.71	0.0338
A_33_P3264200	lnc-SERPINI1-17	lnc-SERPINI1-17:1	-3.74	0.0348
A_23_P401024	LINC00304	LINC00304:2	-3.77	0.0204
A_33_P3362536	lnc-RTL1-13	lnc-RTL1-13:1	-3.77	0.0171
PVD_LNCIPEDIA_2013_13839	lnc-RTL1-1	lnc-RTL1-1:1	-3.91	0.0171
PVD_LNCIPEDIA_2013_8491	lnc-KDM5A-1	lnc-KDM5A-1:1	-3.92	0.0416
A_33_P3416231	lnc-HOXA10-1	lnc-HOXA10-1:1	-3.92	0.0204
PVD_LNCIPEDIA_2013_514	LINC00304	LINC00304:2	-3.96	0.034
PVD_LNCIPEDIA_2013_5793	HOXA-AS2	HOXA-AS2:10	-3.98	0.0204
PVD_LNCIPEDIA_2013_6083	XXYLT1-AS2	XXYLT1-AS2:1	-4.01	0.0294
A_32_P101689	lnc-DDX53-3	lnc-DDX53-3:1	-4.05	0.0185
PVD_LNCIPEDIA_2013_14750	lnc-SLC6A12-4	lnc-SLC6A12-4:1	-4.11	0.0294
PVD_LNCIPEDIA_2013_19873	lnc-ORC4-1	lnc-ORC4-1:1	-4.19	0.0171
PVD_LNCIPEDIA_2013_24968	HOXB-AS2	HOXB-AS2:1	-4.42	0.0171
PVD_LNCIPEDIA_2013_5097	lnc-DLK1-35	lnc-DLK1-35:10	-4.42	0.0171
PVD_LNCIPEDIA_2013_4475	lnc-CSMD1-1	lnc-CSMD1-1:2	-4.47	0.0484
PVD_LNCIPEDIA_2013_7684	lnc-HOXA10-1	lnc-HOXA10-1:1	-4.48	0.0256
PVD_LNCIPEDIA_2013_21273	lnc-NRIP1-2	lnc-NRIP1-2:1	-4.49	0.0256
A_23_P39550	lnc-MAP3K19-5	lnc-MAP3K19-5:1	-4.58	0.0293
A_24_P918032	lnc-NIPA1-1	lnc-NIPA1-1:1	-4.62	0.0256
A_33_P3221458	lnc-POM121L2-2	lnc-POM121L2-2:1	-4.68	0.0181
PVD_LNCIPEDIA_2013_22814	XXYLT1-AS2	XXYLT1-AS2:1	-4.71	0.0294
PVD_LNCIPEDIA_2013_5787	lnc-ETV3-2	lnc-ETV3-2:2	-4.81	0.0171
PVD_LNCIPEDIA_2013_2328	PWRN3	PWRN3:1	-4.87	0.0293
A_33_P3255434	lnc-DLK1-35	lnc-DLK1-35:10	-4.92	0.0197
PVD_LNCIPEDIA_2013_3136	HOXB-AS2	HOXB-AS2:1	-5.06	0.0293
A_33_P3391721	HOXB-AS2	HOXB-AS2:1	-5.1	0.0416
PVD_LNCIPEDIA_2013_23465	lnc-HOXA10-1	lnc-HOXA10-1:1	-5.12	0.0325
PVD_LNCIPEDIA_2013_5803	HOXA10-AS	HOXA10-AS:4	-5.85	0.0298

## Sheet: Table S3
Probe_ID	Gene_ID	Transcript_ID	logFC	Adj.P.Val
A_33_P3316273	lnc-CCL3-1	lnc-CCL3-1:1	6.26	0.0036
PVD_LNCIPEDIA_2013_19559	lnc-RNFT2-1	lnc-RNFT2-1:3	5.71	0.0031
PVD_LNCIPEDIA_2013_13850	lnc-RTN2-1	lnc-RTN2-1:1	5.64	0.0003
A_23_P429998	lnc-FOSB-1	lnc-FOSB-1:1	5.62	0.0002
PVD_LNCIPEDIA_2013_7311	lnc-GSG1-1	lnc-GSG1-1:1	5.26	0.0007
A_23_P19673	lnc-SLC2A12-7	lnc-SLC2A12-7:2	5.07	0.0421
PVD_LNCIPEDIA_2013_13102	lnc-RNFT2-1	lnc-RNFT2-1:3	4.93	0.0002
PVD_LNCIPEDIA_2013_13100	lnc-RNFT2-2	lnc-RNFT2-2:1	4.49	0.0003
PVD_LNCIPEDIA_2013_23031	lnc-RGMA-1	lnc-RGMA-1:1	4.2	0.0007
PVD_LNCIPEDIA_2013_1007	lnc-ALX4-3	lnc-ALX4-3:1	4.06	0.0102
PVD_LNCIPEDIA_2013_8971	lnc-KMT2E-1	lnc-KMT2E-1:10	3.91	0.0031
PVD_LNCIPEDIA_2013_20744	lnc-GSG1-1	lnc-GSG1-1:1	3.84	0.0019
A_24_P927716	lnc-CENPU-1	lnc-CENPU-1:1	3.75	0.0222
PVD_LNCIPEDIA_2013_15073	lnc-SOX15-1	lnc-SOX15-1:1	3.72	0.0484
PVD_LNCIPEDIA_2013_13101	lnc-RNFT2-1	lnc-RNFT2-1:8	3.56	0.0034
PVD_LNCIPEDIA_2013_16611	VIM-AS1	VIM-AS1:10	3.44	0.0262
PVD_LNCIPEDIA_2013_17690	lnc-ZBTB37-1	lnc-ZBTB37-1:1	3.36	0.0051
PVD_LNCIPEDIA_2013_4314	lnc-COX10-3	lnc-COX10-3:1	3.19	0.0474
PVD_LNCIPEDIA_2013_1484	LUCAT1	LUCAT1:1	3	0.0052
A_23_P134851	lnc-GFRA2-4	lnc-GFRA2-4:1	3	0.0162
PVD_LNCIPEDIA_2013_16324	lnc-PIP4P1-1	lnc-PIP4P1-1:1	2.99	0.0097
PVD_LNCIPEDIA_2013_24856	lnc-CETP-1	lnc-CETP-1:2	2.89	0.0256
PVD_LNCIPEDIA_2013_23159	lnc-MRE11-1	lnc-MRE11-1:3	2.87	0.0149
PVD_LNCIPEDIA_2013_19816	lnc-UBE2K-2	lnc-UBE2K-2:11	2.86	0.0122
PVD_LNCIPEDIA_2013_4902	lnc-DDX39A-1	lnc-DDX39A-1:1	2.85	0.0271
A_33_P3242952	lnc-FAM72A-3	lnc-FAM72A-3:1	2.85	0.0309
PVD_LNCIPEDIA_2013_6482	LINC01220	LINC01220:10	2.81	0.024
A_23_P22444	lnc-SYN1-1	lnc-SYN1-1:4	2.76	0.0211
A_23_P141636	lnc-SGSH-5	lnc-SGSH-5:1	2.69	0.037
A_33_P3243652	lnc-C19orf57-6	lnc-C19orf57-6:1	2.67	0.0479
PVD_LNCIPEDIA_2013_879	LINC02520	LINC02520:34	2.66	0.0018
PVD_LNCIPEDIA_2013_12045	lnc-POTEB3-1	lnc-POTEB3-1:1	2.65	0.0266
A_24_P360269	lnc-RPS6KA2-1	lnc-RPS6KA2-1:1	2.62	0.0036
A_23_P149992	lnc-SORBS1-2	lnc-SORBS1-2:1	2.59	0.037
PVD_LNCIPEDIA_2013_23880	lnc-RNFT2-1	lnc-RNFT2-1:1	2.59	0.016
A_24_P263910	LINC01588	LINC01588:41	2.57	0.0377
PVD_LNCIPEDIA_2013_1485	lnc-ARRDC3-2	lnc-ARRDC3-2:1	2.57	0.0205
PVD_LNCIPEDIA_2013_2521	lnc-RHEX-1	lnc-RHEX-1:2	2.56	0.0123
PVD_LNCIPEDIA_2013_17026	lnc-UBE2K-2	lnc-UBE2K-2:1	2.53	0.0197
PVD_LNCIPEDIA_2013_14932	lnc-SNN-1	lnc-SNN-1:4	2.51	0.0258
A_23_P337689	WT1-AS	WT1-AS:10	2.51	0.0381
PVD_LNCIPEDIA_2013_1302	lnc-APIP-1	lnc-APIP-1:1	2.46	0.0164
PVD_LNCIPEDIA_2013_16491	lnc-TOMM20-2	lnc-TOMM20-2:1	2.46	0.037
PVD_LNCIPEDIA_2013_5662	lnc-ENTPD7-1	lnc-ENTPD7-1:1	2.44	0.0107
A_33_P3412418	lnc-NAA15-4	lnc-NAA15-4:4	2.41	0.037
PVD_LNCIPEDIA_2013_5719	lnc-ERGIC1-2	lnc-ERGIC1-2:1	2.41	0.0398
A_33_P3551349	lnc-FXYD4-4	lnc-FXYD4-4:3	2.4	0.0123
A_33_P3295870	lnc-FAM166A-2	lnc-FAM166A-2:1	2.37	0.0256
A_24_P416131	lnc-TLDC1-2	lnc-TLDC1-2:1	2.36	0.0187
A_23_P63798	lnc-KLF6-8	lnc-KLF6-8:2	2.34	0.007
PVD_LNCIPEDIA_2013_4103	lnc-CLVS1-1	lnc-CLVS1-1:1	2.34	0.0256
PVD_LNCIPEDIA_2013_1481	LUCAT1	LUCAT1:1	2.31	0.0395
PVD_LNCIPEDIA_2013_8225	LINC00649	LINC00649:11	2.31	0.0051
PVD_LNCIPEDIA_2013_16512	lnc-TOR1AIP2-4	lnc-TOR1AIP2-4:1	2.31	0.0099
PVD_LNCIPEDIA_2013_2520	lnc-RHEX-1	lnc-RHEX-1:1	2.3	0.0136
A_33_P3414107	lnc-ARRDC3-2	lnc-ARRDC3-2:1	2.28	0.042
A_33_P3396326	lnc-CHD2-20	lnc-CHD2-20:1	2.27	0.0052
PVD_LNCIPEDIA_2013_3041	lnc-C9orf50-5	lnc-C9orf50-5:1	2.23	0.0221
PVD_LNCIPEDIA_2013_2843	HCG14	HCG14:1	2.22	0.023
PVD_LNCIPEDIA_2013_8718	lnc-KLF6-2	lnc-KLF6-2:1	2.2	0.009
PVD_LNCIPEDIA_2013_10608	lnc-LYST-4	lnc-LYST-4:1	2.2	0.0136
A_24_P684186	lnc-MOCS2-9	lnc-MOCS2-9:1	2.19	0.0382
PVD_LNCIPEDIA_2013_3806	lnc-CETP-1	lnc-CETP-1:1	2.17	0.037
PVD_LNCIPEDIA_2013_8226	LINC00649	LINC00649:11	2.11	0.0058
A_33_P3241021	lnc-CD69-1	lnc-CD69-1:2	2.11	0.0473
PVD_LNCIPEDIA_2013_7798	LINC01635	LINC01635:10	2.09	0.0128
PVD_LNCIPEDIA_2013_2043	RPS6KA2-IT1	RPS6KA2-IT1:1	2.09	0.0147
PVD_LNCIPEDIA_2013_16208	lnc-DHX36-2	lnc-DHX36-2:10	2.07	0.0123
PVD_LNCIPEDIA_2013_3774	lnc-CEP19-1	lnc-CEP19-1:1	2.06	0.0136
PVD_LNCIPEDIA_2013_5263	lnc-DROSHA-2	lnc-DROSHA-2:1	2.05	0.016
A_32_P103291	lnc-SMYD3-6	lnc-SMYD3-6:2	2.02	0.0158
A_23_P69188	lnc-RFTN1-3	lnc-RFTN1-3:1	2	0.0083
A_33_P3334923	ATP2B1-AS1	ATP2B1-AS1:10	2	0.0128
A_32_P88905	lnc-CAB39L-10	lnc-CAB39L-10:2	2	0.0496
PVD_LNCIPEDIA_2013_17683	lnc-ZBTB20-1	lnc-ZBTB20-1:1	-2	0.0248
A_32_P38623	lnc-PPP1R9A-1	lnc-PPP1R9A-1:1	-2.01	0.0184
PVD_LNCIPEDIA_2013_21852	lnc-RTL8C-1	lnc-RTL8C-1:1	-2.01	0.0066
A_33_P3402329	MIR503HG	MIR503HG:13	-2.01	0.0317
PVD_LNCIPEDIA_2013_12194	lnc-PPP6C-2	lnc-PPP6C-2:1	-2.01	0.0258
PVD_LNCIPEDIA_2013_25284	lnc-C20orf203-1	lnc-C20orf203-1:1	-2.02	0.0181
PVD_LNCIPEDIA_2013_17788	LINC00665	LINC00665:1	-2.02	0.0497
PVD_LNCIPEDIA_2013_12210	lnc-PRDM11-3	lnc-PRDM11-3:10	-2.03	0.0135
A_32_P40547	lnc-DLK1-35	lnc-DLK1-35:10	-2.04	0.05
PVD_LNCIPEDIA_2013_14870	RAI1-AS1	RAI1-AS1:1	-2.04	0.0102
PVD_LNCIPEDIA_2013_12507	MIR3142HG	MIR3142HG:1	-2.04	0.0239
PVD_LNCIPEDIA_2013_7331	lnc-GTDC1-2	lnc-GTDC1-2:1	-2.04	0.0211
PVD_LNCIPEDIA_2013_10644	THRB-IT1	THRB-IT1:1	-2.04	0.0321
A_33_P3543133	LINC00641	LINC00641:3	-2.04	0.0321
A_24_P317907	lnc-SORBS1-1	lnc-SORBS1-1:1	-2.05	0.037
PVD_LNCIPEDIA_2013_5303	lnc-DTWD1-2	lnc-DTWD1-2:1	-2.06	0.0262
PVD_LNCIPEDIA_2013_7982	lnc-IL17RA-36	lnc-IL17RA-36:13	-2.06	0.0151
PVD_LNCIPEDIA_2013_4433	lnc-TEFM-12	lnc-TEFM-12:1	-2.07	0.0317
PVD_LNCIPEDIA_2013_496	lnc-ACOT9-2	lnc-ACOT9-2:1	-2.07	0.0122
PVD_LNCIPEDIA_2013_17748	lnc-CLP1-3	lnc-CLP1-3:1	-2.08	0.0177
PVD_LNCIPEDIA_2013_1323	lnc-APOC3-3	lnc-APOC3-3:1	-2.08	0.0215
PVD_LNCIPEDIA_2013_19425	lnc-RADIL-1	lnc-RADIL-1:1	-2.1	0.0184
PVD_LNCIPEDIA_2013_24266	lnc-PCP4L1-46	lnc-PCP4L1-46:1	-2.1	0.0266
PVD_LNCIPEDIA_2013_8795	LINC00987	LINC00987:1	-2.11	0.0104
A_33_P3258383	lnc-IFT46-1	lnc-IFT46-1:1	-2.11	0.0151
PVD_LNCIPEDIA_2013_5103	lnc-DLK1-35	lnc-DLK1-35:114	-2.11	0.0128
PVD_LNCIPEDIA_2013_3273	lnc-CCDC117-1	lnc-CCDC117-1:11	-2.11	0.0084
A_33_P3797820	LINC00863	LINC00863:5	-2.13	0.0151
PVD_LNCIPEDIA_2013_15068	lnc-SOX13-1	lnc-SOX13-1:1	-2.15	0.0083
PVD_LNCIPEDIA_2013_18159	lnc-ZNF791-2	lnc-ZNF791-2:1	-2.16	0.0232
A_33_P3307307	lnc-TTC36-2	lnc-TTC36-2:1	-2.16	0.0218
PVD_LNCIPEDIA_2013_24098	MIR503HG	MIR503HG:13	-2.17	0.0466
A_33_P3697530	lnc-SHC3-6	lnc-SHC3-6:1	-2.18	0.0211
PVD_LNCIPEDIA_2013_11961	lnc-PML-2	lnc-PML-2:1	-2.18	0.0267
A_33_P3402188	lnc-TAS2R43-1	lnc-TAS2R43-1:1	-2.18	0.0444
A_33_P3780901	lnc-CDK2AP1-2	lnc-CDK2AP1-2:1	-2.19	0.021
PVD_LNCIPEDIA_2013_21244	lnc-TRMO-2	lnc-TRMO-2:1	-2.2	0.0306
PVD_LNCIPEDIA_2013_20890	lnc-CGGBP1-1	lnc-CGGBP1-1:1	-2.2	0.0358
PVD_LNCIPEDIA_2013_8797	lnc-KLRG2-1	lnc-KLRG2-1:1	-2.2	0.0278
A_23_P390209	lnc-BRF1-13	lnc-BRF1-13:1	-2.2	0.0177
PVD_LNCIPEDIA_2013_15886	lnc-TFB2M-1	lnc-TFB2M-1:1	-2.21	0.0268
PVD_LNCIPEDIA_2013_5096	lnc-DLK1-35	lnc-DLK1-35:10	-2.22	0.0415
A_33_P3332581	lnc-SERPINI1-17	lnc-SERPINI1-17:1	-2.23	0.0128
PVD_LNCIPEDIA_2013_514	LINC00304	LINC00304:2	-2.23	0.0222
PVD_LNCIPEDIA_2013_17900	lnc-ZNF207-1	lnc-ZNF207-1:1	-2.24	0.0085
PVD_LNCIPEDIA_2013_17343	lnc-VSIG10-1	lnc-VSIG10-1:1	-2.24	0.0097
A_23_P375147	lnc-RC3H2-1	lnc-RC3H2-1:1	-2.25	0.0085
PVD_LNCIPEDIA_2013_13839	lnc-RTL1-1	lnc-RTL1-1:1	-2.25	0.0421
PVD_LNCIPEDIA_2013_25659	lnc-PAPOLG-1	lnc-PAPOLG-1:1	-2.26	0.0158
PVD_LNCIPEDIA_2013_13166	lnc-OTX2-10	lnc-OTX2-10:1	-2.28	0.0158
PVD_LNCIPEDIA_2013_21894	WWC3-AS1	WWC3-AS1:1	-2.28	0.0083
PVD_LNCIPEDIA_2013_23960	lnc-LLPH-2	lnc-LLPH-2:10	-2.28	0.0348
PVD_LNCIPEDIA_2013_19686	lnc-NUTM2G-6	lnc-NUTM2G-6:1	-2.28	0.0095
PVD_LNCIPEDIA_2013_7665	LINC00641	LINC00641:1	-2.28	0.0164
PVD_LNCIPEDIA_2013_144	lnc-CCDC182-2	lnc-CCDC182-2:1	-2.28	0.0399
A_23_P401024	LINC00304	LINC00304:2	-2.29	0.0094
PVD_LNCIPEDIA_2013_19808	LINC00641	LINC00641:1	-2.29	0.0136
PVD_LNCIPEDIA_2013_19965	lnc-TOX4-1	lnc-TOX4-1:1	-2.29	0.0494
PVD_LNCIPEDIA_2013_11096	lnc-OPHN1-1	lnc-OPHN1-1:1	-2.3	0.0081
PVD_LNCIPEDIA_2013_7582	lnc-HIVEP2-1	lnc-HIVEP2-1:1	-2.31	0.0311
PVD_LNCIPEDIA_2013_8505	lnc-KHDRBS2-1	lnc-KHDRBS2-1:1	-2.31	0.0072
PVD_LNCIPEDIA_2013_6658	lnc-TTC14-1	lnc-TTC14-1:6	-2.31	0.0479
PVD_LNCIPEDIA_2013_10969	LINC01284	LINC01284:10	-2.32	0.0372
PVD_LNCIPEDIA_2013_19552	lnc-CCDC182-1	lnc-CCDC182-1:1	-2.33	0.0271
PVD_LNCIPEDIA_2013_15979	lnc-THRSP-3	lnc-THRSP-3:1	-2.34	0.0266
PVD_LNCIPEDIA_2013_24426	lnc-CLVS2-3	lnc-CLVS2-3:1	-2.35	0.0143
PVD_LNCIPEDIA_2013_5109	lnc-DLK1-35	lnc-DLK1-35:120	-2.37	0.0136
PVD_LNCIPEDIA_2013_8786	lnc-KLHL5-1	lnc-KLHL5-1:1	-2.38	0.0239
A_24_P21770	lnc-YPEL4-1	lnc-YPEL4-1:4	-2.39	0.0079
A_32_P168464	lnc-MED14-6	lnc-MED14-6:1	-2.39	0.0222
PVD_LNCIPEDIA_2013_21282	lnc-NPY2R-1	lnc-NPY2R-1:1	-2.4	0.0131
PVD_LNCIPEDIA_2013_1882	lnc-BCL9L-2	lnc-BCL9L-2:1	-2.42	0.0235
A_33_P3321781	lnc-VEZF1-1	lnc-VEZF1-1:1	-2.42	0.0465
A_33_P3209167	lnc-PQLC2-1	lnc-PQLC2-1:1	-2.42	0.037
A_33_P3414037	lnc-DYDC1-1	lnc-DYDC1-1:1	-2.43	0.0324
A_23_P129103	lnc-RPS17-5	lnc-RPS17-5:1	-2.43	0.0063
A_33_P3651911	lnc-AGO2-1	lnc-AGO2-1:1	-2.43	0.0271
PVD_LNCIPEDIA_2013_4570	lnc-ZNF587-2	lnc-ZNF587-2:1	-2.43	0.0473
A_33_P3389693	CYYR1-AS1	CYYR1-AS1:2	-2.44	0.0088
PVD_LNCIPEDIA_2013_1307	lnc-APOA1-4	lnc-APOA1-4:1	-2.47	0.0151
A_33_P3231557	lnc-ZNF367-2	lnc-ZNF367-2:1	-2.47	0.022
PVD_LNCIPEDIA_2013_779	lnc-AIG1-3	lnc-AIG1-3:1	-2.49	0.0149
PVD_LNCIPEDIA_2013_11885	MME-AS1	MME-AS1:1	-2.5	0.0437
PVD_LNCIPEDIA_2013_3018	lnc-TRMO-2	lnc-TRMO-2:1	-2.5	0.0363
PVD_LNCIPEDIA_2013_4958	lnc-DEXI-2	lnc-DEXI-2:1	-2.5	0.0211
PVD_LNCIPEDIA_2013_4631	DAPK1-IT1	DAPK1-IT1:1	-2.5	0.0136
PVD_LNCIPEDIA_2013_2044	lnc-BRSK1-1	lnc-BRSK1-1:1	-2.5	0.0415
A_33_P3227944	lnc-LINC02210-CRHR1-52	lnc-LINC02210-CRHR1-52:14	-2.52	0.0272
PVD_LNCIPEDIA_2013_7018	MAGI2-AS3	MAGI2-AS3:10	-2.52	0.0381
PVD_LNCIPEDIA_2013_23417	lnc-OTX2-10	lnc-OTX2-10:1	-2.54	0.0138
A_33_P3417427	ST8SIA6-AS1	ST8SIA6-AS1:3	-2.54	0.0399
A_32_P96134	lnc-FKBP9-3	lnc-FKBP9-3:1	-2.57	0.0147
PVD_LNCIPEDIA_2013_25440	lnc-ARFGAP2-1	lnc-ARFGAP2-1:1	-2.57	0.0099
PVD_LNCIPEDIA_2013_3349	lnc-CCDC68-2	lnc-CCDC68-2:1	-2.57	0.0216
A_33_P3247392	lnc-CSNK1E-1	lnc-CSNK1E-1:1	-2.6	0.0111
PVD_LNCIPEDIA_2013_19930	lnc-LEMD3-1	lnc-LEMD3-1:1	-2.6	0.0151
PVD_LNCIPEDIA_2013_8935	lnc-LEMD3-1	lnc-LEMD3-1:1	-2.61	0.0158
A_33_P3735771	DANT2	DANT2:1	-2.61	0.0215
PVD_LNCIPEDIA_2013_24240	lnc-WASL-1	lnc-WASL-1:1	-2.62	0.0066
A_32_P101689	lnc-DDX53-3	lnc-DDX53-3:1	-2.62	0.0044
PVD_LNCIPEDIA_2013_2820	lnc-C5orf42-1	lnc-C5orf42-1:1	-2.63	0.0168
PVD_LNCIPEDIA_2013_19177	lnc-IQCG-1	lnc-IQCG-1:1	-2.63	0.0275
PVD_LNCIPEDIA_2013_11960	lnc-PML-1	lnc-PML-1:1	-2.65	0.0071
PVD_LNCIPEDIA_2013_5793	HOXA-AS2	HOXA-AS2:10	-2.67	0.0081
PVD_LNCIPEDIA_2013_24968	HOXB-AS2	HOXB-AS2:1	-2.69	0.0203
PVD_LNCIPEDIA_2013_3648	lnc-CDK17-1	lnc-CDK17-1:1	-2.72	0.0222
PVD_LNCIPEDIA_2013_5324	lnc-DUSP1-4	lnc-DUSP1-4:1	-2.72	0.0079
A_23_P312358	lnc-BEND7-1	lnc-BEND7-1:1	-2.72	0.0026
A_24_P76300	lnc-ZNF154-1	lnc-ZNF154-1:1	-2.72	0.0019
PVD_LNCIPEDIA_2013_12545	lnc-PZP-2	lnc-PZP-2:1	-2.72	0.0102
PVD_LNCIPEDIA_2013_11336	lnc-PAPOLG-1	lnc-PAPOLG-1:1	-2.73	0.0005
A_33_P3294031	KCNQ1OT1	KCNQ1OT1:1	-2.74	0.0069
A_33_P3613516	GATA2-AS1	GATA2-AS1:5	-2.74	0.0031
A_33_P3264200	lnc-SERPINI1-17	lnc-SERPINI1-17:1	-2.76	0.0063
PVD_LNCIPEDIA_2013_23585	lnc-ZCCHC9-1	lnc-ZCCHC9-1:1	-2.77	0.0051
A_24_P214552	LINC01565	LINC01565:1	-2.77	0.0143
PVD_LNCIPEDIA_2013_17304	ST8SIA6-AS1	ST8SIA6-AS1:7	-2.77	0.0083
A_32_P71113	lnc-SCAI-2	lnc-SCAI-2:1	-2.78	0.0072
A_23_P53663	lnc-PPP1R12A-2	lnc-PPP1R12A-2:1	-2.78	0.0055
A_32_P32413	lnc-SETBP1-2	lnc-SETBP1-2:1	-2.78	0.0211
PVD_LNCIPEDIA_2013_6083	XXYLT1-AS2	XXYLT1-AS2:1	-2.79	0.009
A_24_P880043	lnc-HECTD2-3	lnc-HECTD2-3:1	-2.79	0.0136
PVD_LNCIPEDIA_2013_19742	lnc-AGGF1-2	lnc-AGGF1-2:1	-2.8	0.0143
A_33_P3245679	lnc-LLPH-2	lnc-LLPH-2:8	-2.83	0.037
A_33_P3362536	lnc-RTL1-13	lnc-RTL1-13:1	-2.85	0.0235
PVD_LNCIPEDIA_2013_14793	lnc-PRDM14-6	lnc-PRDM14-6:1	-2.85	0.0497
A_32_P148745	lnc-THSD7A-4	lnc-THSD7A-4:1	-2.85	0.0261
PVD_LNCIPEDIA_2013_5530	lnc-AGO2-1	lnc-AGO2-1:1	-2.86	0.0064
PVD_LNCIPEDIA_2013_8491	lnc-KDM5A-1	lnc-KDM5A-1:1	-2.87	0.0147
PVD_LNCIPEDIA_2013_1516	lnc-ASB15-1	lnc-ASB15-1:1	-2.9	0.0177
PVD_LNCIPEDIA_2013_17886	lnc-ZNF154-1	lnc-ZNF154-1:1	-2.93	0.0031
PVD_LNCIPEDIA_2013_724	lnc-AGGF1-2	lnc-AGGF1-2:1	-2.93	0.0168
A_32_P846696	FAM66B	FAM66B:13	-2.95	0.0437
A_24_P784765	lnc-C11orf91-1	lnc-C11orf91-1:1	-2.95	0.0062
PVD_LNCIPEDIA_2013_10537	lnc-NEK3-1	lnc-NEK3-1:1	-2.97	0.0063
PVD_LNCIPEDIA_2013_23654	LINC02019	LINC02019:6	-2.98	0.0321
A_24_P189739	lnc-MANSC1-3	lnc-MANSC1-3:1	-3.03	0.0145
PVD_LNCIPEDIA_2013_10841	lnc-NRG1-2	lnc-NRG1-2:1	-3.05	0.0058
A_23_P394448	lnc-FKBP9-4	lnc-FKBP9-4:2	-3.09	0.0342
PVD_LNCIPEDIA_2013_21042	lnc-AIG1-8	lnc-AIG1-8:13	-3.1	0.0293
A_33_P3221458	lnc-POM121L2-2	lnc-POM121L2-2:1	-3.11	0.0145
PVD_LNCIPEDIA_2013_22814	XXYLT1-AS2	XXYLT1-AS2:1	-3.13	0.0076
A_23_P39550	lnc-MAP3K19-5	lnc-MAP3K19-5:1	-3.14	0.0063
PVD_LNCIPEDIA_2013_971	CPNE8-AS1	CPNE8-AS1:4	-3.23	0.0022
A_23_P303718	lnc-COL21A1-1	lnc-COL21A1-1:1	-3.23	0.0321
A_24_P918032	lnc-NIPA1-1	lnc-NIPA1-1:1	-3.25	0.0205
PVD_LNCIPEDIA_2013_5097	lnc-DLK1-35	lnc-DLK1-35:10	-3.25	0.0066
A_33_P3215113	lnc-SPANXC-2	lnc-SPANXC-2:1	-3.26	0.001
PVD_LNCIPEDIA_2013_20738	lnc-IL12RB2-1	lnc-IL12RB2-1:1	-3.32	0.0031
PVD_LNCIPEDIA_2013_6099	lnc-FAM49A-1	lnc-FAM49A-1:1	-3.35	0.023
A_23_P252758	lnc-TRPV5-1	lnc-TRPV5-1:1	-3.38	0.0222
PVD_LNCIPEDIA_2013_5593	lnc-ELOVL5-2	lnc-ELOVL5-2:1	-3.4	0.0031
A_23_P27424	lnc-ZNF256-2	lnc-ZNF256-2:2	-3.4	0.0031
PVD_LNCIPEDIA_2013_13721	lnc-RPL26L1-1	lnc-RPL26L1-1:1	-3.43	0.0165
PVD_LNCIPEDIA_2013_23447	lnc-C1QBP-4	lnc-C1QBP-4:1	-3.46	0.0433
PVD_LNCIPEDIA_2013_3136	HOXB-AS2	HOXB-AS2:1	-3.49	0.0059
A_33_P3416231	lnc-HOXA10-1	lnc-HOXA10-1:1	-3.5	0.0003
PVD_LNCIPEDIA_2013_3740	lnc-CELF2-2	lnc-CELF2-2:1	-3.51	0.0005
A_33_P3299958	lnc-HNRNPA2B1-15	lnc-HNRNPA2B1-15:1	-3.52	0.0033
A_33_P3271121	lnc-AGAP1-5	lnc-AGAP1-5:1	-3.6	0.0011
PVD_LNCIPEDIA_2013_19873	lnc-ORC4-1	lnc-ORC4-1:1	-3.66	0.0002
PVD_LNCIPEDIA_2013_632	lnc-COQ8A-1	lnc-COQ8A-1:1	-3.81	0.0031
PVD_LNCIPEDIA_2013_14750	lnc-SLC6A12-4	lnc-SLC6A12-4:1	-3.82	0.0033
A_23_P380526	lnc-DPPA4-1	lnc-DPPA4-1:4	-3.95	0.0062
PVD_LNCIPEDIA_2013_21273	lnc-NRIP1-2	lnc-NRIP1-2:1	-3.97	0.0003
A_33_P3255434	lnc-DLK1-35	lnc-DLK1-35:10	-4.01	0.0123
A_33_P3391721	HOXB-AS2	HOXB-AS2:1	-4.03	0.0072
PVD_LNCIPEDIA_2013_9456	lnc-MAP7-1	lnc-MAP7-1:1	-4.14	0.0003
PVD_LNCIPEDIA_2013_5108	lnc-DLK1-35	lnc-DLK1-35:120	-4.28	0.0066
A_33_P3220615	lnc-PRDM1-6	lnc-PRDM1-6:1	-4.33	0.0051
PVD_LNCIPEDIA_2013_7684	lnc-HOXA10-1	lnc-HOXA10-1:1	-4.57	0.0002
PVD_LNCIPEDIA_2013_5107	lnc-DLK1-35	lnc-DLK1-35:120	-4.74	0.0051
PVD_LNCIPEDIA_2013_23465	lnc-HOXA10-1	lnc-HOXA10-1:1	-4.76	0.0009
PVD_LNCIPEDIA_2013_15941	lnc-HAAO-7	lnc-HAAO-7:1	-5.08	0.0003
PVD_LNCIPEDIA_2013_10848	lnc-NRIP1-2	lnc-NRIP1-2:1	-5.84	0.0031
PVD_LNCIPEDIA_2013_5803	HOXA10-AS	HOXA10-AS:4	-6.14	0
PVD_LNCIPEDIA_2013_4674	lnc-CXCL2-1	lnc-CXCL2-1:1	-6.97	0.0004
A_23_P500998	lnc-HOXA10-1	lnc-HOXA10-1:1	-7.86	0.0002

## Sheet: Table S4
Probe_ID	Gene_ID	logFC	Adj.P.Val
MIMAT0004568	hsa-miR-221-5p	7.36	0.00022
MIMAT0005901	hsa-miR-1249-3p	5.75	0.00088
MIMAT0000750	hsa-miR-340-3p	5.28	0.00071
MIMAT0004484	hsa-let-7d-3p	2.71	0.0019
MIMAT0000258	hsa-miR-181c-5p	-2.92	0.03557
MIMAT0000419	hsa-miR-27b-3p	-3.68	0.04463
MIMAT0002821	hsa-miR-181d-5p	-3.82	0.00297
MIMAT0025856	hsa-miR-6724-5p	-3.94	0.00094
MIMAT0000074	hsa-miR-19b-3p	-4.86	0.03842
MIMAT0000423	hsa-miR-125b-5p	-4.94	0.04932
MIMAT0004911	hsa-miR-874-3p	-4.97	0.03842
MIMAT0002859	hsa-miR-516b-5p	-5	0.00204
MIMAT0000736	hsa-miR-381-3p	-5.15	0.02338
MIMAT0004603	hsa-miR-125b-2-3p	-5.21	0.02326
MIMAT0000418	hsa-miR-23b-3p	-5.61	0.00787
MIMAT0000707	hsa-miR-363-3p	-5.63	0.02766
MIMAT0000253	hsa-miR-10a-5p	-5.79	0
MIMAT0004814	hsa-miR-654-3p	-5.81	0.00055
MIMAT0000087	hsa-miR-30a-5p	-5.92	0.00963
MIMAT0000097	hsa-miR-99a-5p	-6.75	0.00071
MIMAT0000073	hsa-miR-19a-3p	-7.42	0.00022
MIMAT0001080	hsa-miR-196b-5p	-9.17	1e-06

## Sheet: Table S5
Probe_ID	Gene_ID	logFC	Adj.P.Val
MIMAT0004570	hsa-miR-223-5p	7.37	0.0077
MIMAT0003249	hsa-miR-584-5p	6.84	0.00032
MIMAT0004985	hsa-miR-942-5p	6.24	0.00013
MIMAT0004810	hsa-miR-629-5p	5.4	0.0001
MIMAT0004569	hsa-miR-222-5p	5.36	0.00044
MIMAT0005882	hsa-miR-548k	5.04	0.00089
MIMAT0004568	hsa-miR-221-5p	5	0.02048
MIMAT0001343	hsa-miR-425-3p	4.56	0.01545
MIMAT0000086	hsa-miR-29a-3p	4.52	0.03126
MIMAT0016888	hsa-miR-4326	4.27	0.0147
MIMAT0001618	hsa-miR-191-3p	4.27	0.03332
MIMAT0019214	hsa-miR-3173-5p	4.23	0.01433
MIMAT0000751	hsa-miR-330-3p	3.92	0.03181
MIMAT0025485	hsa-miR-6514-3p	3.58	0.04334
MIMAT0000731	hsa-miR-378a-5p	3.57	0.0442
MIMAT0005919	hsa-miR-548o-3p	3.1	0.03675
MIMAT0016847	hsa-miR-378c	3.02	0.03474
MIMAT0000278	hsa-miR-221-3p	2.92	0.00032
MIMAT0000279	hsa-miR-222-3p	2.86	1e-05
MIMAT0000280	hsa-miR-223-3p	2.85	0.01631
MIMAT0000067	hsa-let-7f-5p	2.62	0.00179
MIMAT0003393	hsa-miR-425-5p	2.58	0.00257
MIMAT0000256	hsa-miR-181a-5p	2.24	0.0001
MIMAT0000065	hsa-let-7d-5p	2.02	0.00228
MIMAT0000732	hsa-miR-378a-3p	2.02	0.00179
MIMAT0005929	hsa-miR-1275	-2.43	0.02626
MIMAT0017985	hsa-miR-3607-3p	-3.08	0.047
MIMAT0004694	hsa-miR-342-5p	-3.13	0.00303
MIMAT0000254	hsa-miR-10b-5p	-3.76	0.02092
MIMAT0025856	hsa-miR-6724-5p	-4.43	0.0001
MIMAT0002177	hsa-miR-486-5p	-4.56	0.00179
MIMAT0004508	hsa-miR-92a-2-5p	-4.62	0.01433
MIMAT0000446	hsa-miR-127-3p	-4.77	0.01433
MIMAT0000707	hsa-miR-363-3p	-5.02	0.01962
MIMAT0004814	hsa-miR-654-3p	-5.05	0.00169
MIMAT0000421	hsa-miR-122-5p	-5.16	0.03235
MIMAT0004603	hsa-miR-125b-2-3p	-5.18	0.01054
MIMAT0000087	hsa-miR-30a-5p	-5.21	0.01628
MIMAT0000423	hsa-miR-125b-5p	-5.24	0.01111
MIMAT0000097	hsa-miR-99a-5p	-5.24	0.01455
MIMAT0000064	hsa-let-7c-5p	-5.3	0.01054
MIMAT0002171	hsa-miR-410-3p	-5.32	0.04065
MIMAT0003329	hsa-miR-411-5p	-5.75	0.00296
MIMAT0000243	hsa-miR-148a-3p	-5.79	0.00517
MIMAT0001639	hsa-miR-409-3p	-6.05	0.02347
MIMAT0002814	hsa-miR-432-5p	-6.1	0.0003
MIMAT0004697	hsa-miR-151a-5p	-6.31	0.00539
MIMAT0002175	hsa-miR-485-5p	-6.36	0.00013
MIMAT0000736	hsa-miR-381-3p	-6.78	0.00027
MIMAT0001080	hsa-miR-196b-5p	-9.63	2.04e-08
MIMAT0000253	hsa-miR-10a-5p	-9.67	1.59e-06

## Sheet: Table S6
				lnc-CHST2-2																lnc-EPS15L1-3																					lnc-KLHL25-4
				1	2	3	4	7	9	11	12	15	16	17	18	19	20	22	23	1	2	3	5	6	7	8	9	10	11	12	13	14	15	16	17	18	20	21	22	23	1	2	3	5	7	9	10	11	12
			ACAA1											●					●																●					●
1	ADIPOGENESIS		ADAR																													●
2	ANDROGEN_RESPONSE		ADRM1																		●			●							●											●
3	APOPTOSIS		AEN												●																					●
4	CHOLESTEROL_HOMEOSTASIS		AGO4																					●
5	COAGULATION		AHNAK								●																			●																			●
6	DNA_REPAIR		AHR																											●	●																		●
7	E2F_TARGETS		AIFM3																			●																					●
8	ESTROGEN_RESPONSE_LATE		ALDH3B1																							●
9	G2M_CHECKPOINT		ALOX15B												●																					●
10	HEME_METABOLISM		AMD1						●																		●																			●
11	HYPOXIA		ANG
12	IL2_STAT5_SIGNALING		ANP32E													●
13	INFLAMMATORY_RESPONSE		ANXA1			●																●	●																				●	●
14	INTERFERON_ALPHA_RESPONSE		ANXA2							●																			●																			●
15	MTORC1_SIGNALING		ANXA4								●																			●
16	MYC_TARGETS_V1		AP2M1													●
17	OXIDATIVE_PHOSPHORYLATION		AP2S1													●			●
18	P53_PATHWAY		AP3S1													●
19	PROTEIN_SECRETION		ARAF																	●																					●
20	REACTIVE_OXYGEN_SPECIES_PATHWAY		ARID4B																																			●
21	TGF_BETA_SIGNALING		ARL4A	●							●									●										●											●								●
22	TNFA_SIGNALING_VIA_NFKB		ARRB2																●
23	UV_RESPONSE_UP		ATF3			●	●			●					●			●	●			●							●							●			●	●			●					●
			ATP2B1															●													●								●
	correlated		ATP5MF											●
	anti-correlated		ATP5PB																																●
			ATP5PF											●																					●
			ATP6V0B																																●
			ATP6V1D									●		●
			BACH1																									●																			●
			BCL2							●	●
			BCL2L11			●													●			●																		●			●
			BHLHE40							●	●	●						●
			BIK																			●
			BLVRB
			BMF																			●																					●
			BNIP3													●
			BST2																													●
			C3AR1																												●
			C8G																				●																					●
			CA2																																												●		●
			CACYBP									●
			CADM1
			CANX
			CASP8																			●																					●
			CBX5					●																	●																				●
			CCL24																												●
			CCL5																												●								●
			CCL7
			CCN1																										●										●
			CCNA1			●
			CCNT1						●
			CD302	●																●																					●
			CD55
			CD69																			●									●								●				●
			CD83								●							●												●									●										●
			CD86																																														●
			CD9				●					●
			CDC27						●
			CDC6																								●
			CDC7																																											●
			CDKN1A			●				●		●			●			●				●							●		●		●			●			●				●					●
			CDKN2A												●
			CDKN2C	●																●																					●
			CEBPA												●																					●
			CEBPD																																				●
			CFD																				●																					●
			CHAF1A																																											●
			CHCHD10	●
			CHST2							●
			CITED2							●																			●																			●
			CLIC3																							●
			CMTR1																													●
			CNBP																															●
			COL4A2
			COQ5																	●
			COX17											●										●											●
			COX7A2											●
			COX7B	●										●						●															●						●
			COX8A	●										●
			CREG1																●																					●
			CST7								●
			CTNS																									●																			●
			CTPS1
			CTSB																				●					●																●			●
			CTSC									●				●																	●
			CUL1																								●							●
			CXCL1																																				●
			CXCL12
			CXCL2																																				●	●
			CXCL3																																				●
			CXCL8																												●
			CYCS																																●
			DAB2
			DBI		●																●																					●
			DDB2												●									●												●
			DDX18										●																					●
			DGAT1																																						●
			DHRS3								●																			●																			●
			DKC1						●																		●																			●
			DMTN																																												●
			DNAJA1																			●																		●			●
			DNAJB1																●																					●
			DNAJC3			●																●																					●
			DONSON					●																	●																				●
			DTNA							●
			DUSP2																							●													●
			DUSP5															●																					●
			DUSP6																				●																					●
			EGR1																																				●
			EHD1															●
			EIF1																																				●
			EIF2S2										●
			EIF3J										●
			ELL																					●
			EMP1			●					●											●								●													●						●
			ENDOD1
			ENPP1								●
			ERRFI1																																													●
			ESRRA	●																●																					●
			ETF1										●
			EWSR1						●																		●																			●
			EXOSC7										●																					●
			F3							●								●																										●				●
			F8
			FABP5																							●
			FAM162A							●					●														●							●
			FANCC																								●																			●
			FAS																			●														●							●
			FKBP5																		●					●
			FOXN3																								●																			●
			FTL														●																				●
			FUT4															●																					●
			GADD45A																	●		●														●			●
			GADD45B			●					●							●				●								●									●				●						●
			GALC													●
			GALM																											●																			●
			GAPVD1																									●																			●
			GAS1
			GJA1
			GLA									●				●										●							●
			GLRX5
			GLUD1											●																					●
			GM2A												●
			GPAM																	●
			GPAT4																	●																					●
			GPR183															●
			GPX1			●																●																					●
			GPX4	●		●					●			●			●
			GRPEL1	●										●					●	●															●					●	●
			GSN			●																●	●																				●	●
			GSR		●	●						●					●
			GSTO1								●
			GTF2H5
			H1-2												●																					●
			H2AX																●																					●
			H2AZ2						●																		●																			●
			HCCS																																●
			HDGF
			HEXA																										●																			●
			HEXIM1																																	●
			HGF			●																●
			HK2							●	●	●																	●	●			●															●	●
			HMGB2			●																●																					●
			HMGB3					●	●																●		●																		●	●
			HMOX2																																		●
			HNRNPA1										●																					●
			HNRNPA2B1										●
			HNRNPA3										●																					●
			HNRNPC																															●
			HNRNPD																						●		●							●											●	●
			HNRNPR										●																					●
			HNRNPU						●				●
			HOMER2		●																●					●																●
			HR																							●
			HSP90AB1										●																					●
			HSPB1			●																●
			HTATIP2																									●																			●
			ICAM4
			ICOSLG															●													●								●
			IDH3A	●										●
			IER2																																				●
			IER3																			●							●							●			●				●					●
			IER5
			IFI30									●			●																		●			●
			IFIT2															●																					●
			IFRD1																														●
			IGFBP4																							●
			IL10RA								●																			●	●																		●
			IL15																													●
			IL32
			ILF2										●
			ILF3					●	●																●		●																		●	●
			IPO7																						●
			IRS2							●								●											●										●									●
			ITGA7	●
			ITGB2									●
			ITGB4																																	●
			JMJD6							●																			●																			●
			JUN			●				●					●			●				●							●							●			●				●					●
			JUNB																																		●	●	●	●
			KLF6							●	●							●											●	●	●								●									●	●
			KLF9																																				●
			KLK3																		●																					●
			KLK8																				●													●								●
			KMT5A						●
			KPNB1						●				●														●							●												●
			KRT17																																	●
			KYNU																																				●
			LGALS1
			LGALS3			●	●
			LMNA			●																●																					●
			LPAR1																												●
			LRRC8C																																														●
			LUC7L3					●																	●
			LY6E																												●
			MAP2K3																									●					●						●								●
			MAP3K20																								●																			●
			MAP3K8								●							●												●									●										●
			MAPK14						●																		●																			●
			MARCKS						●																		●																			●
			MCL1																			●																	●				●
			MDM2																																	●
			MFAP5
			MGST3	●										●						●								●							●						●						●
			MRAP	●
			MRPL40
			MRPS22																																●
			MTF2						●																																					●
			MXD1								●				●			●												●	●					●			●										●
			MYC																											●	●								●										●
			MYL12A		●																●																					●
			MYOF																							●
			NABP1	●																●																					●
			NAMPT																												●		●						●
			NAP1L1																																										●
			NAT1																●																					●
			NDRG1		●					●	●				●						●								●	●						●						●						●	●
			NDUFA1											●
			NDUFB2											●																					●
			NDUFB7	●										●
			NELFB																					●
			NFIL3				●			●	●	●						●											●	●			●						●
			NFKBIZ																											●																			●
			NIBAN1				●					●
			NLRP3																												●
			NOCT							●																			●
			NPM1										●																					●
			NR4A2															●																					●
			NRP1								●																			●																			●
			NSD2						●																		●																			●
			NT5C																					●
			NT5E																											●																			●
			NUDT21					●																	●																				●
			NUP153					●
			NUP98						●																		●																			●
			OSM
			P2RX4																											●	●																		●
			P2RY2																												●
			PAFAH1B1						●																		●																			●
			PARP9																													●
			PCNA												●
			PDE4B															●						●							●								●
			PDK1																										●				●
			PDS5B					●	●																●		●																		●	●
			PGF																										●
			PGM2																										●																			●
			PHLDA1								●							●
			PLAU															●					●																●
			PLAUR				●			●								●
			PLCB2			●
			PLEC																											●																			●
			PLEK															●					●																●					●
			PLIN2	●						●	●									●									●	●											●							●	●
			PLK3												●																					●
			PLOD3
			PMAIP1			●																●																					●
			PML						●																		●																			●
			PMS2					●																	●																				●
			PNP								●	●												●						●			●																●
			POLE3
			POLE4
			POLR2E																					●
			POLR2G																					●
			PPIF																●
			PPM1G																															●
			PPP1R15A							●		●			●			●											●				●			●		●	●									●
			PRPF4B						●
			PRPS1																						●																				●
			PSIP1																						●																				●
			PSMA4									●
			PSMB2										●																					●
			PSMD1										●																					●
			PSMD3
			PSMD8
			PTGER2								●																			●	●																		●
			PTGER4															●													●								●
			PTK2B																		●																					●
			PURA																								●
			QSOX1
			RAD23A																									●
			RAD51C												●
			RAN																						●									●
			RARA																			●																					●
			RER1													●
			RETN	●
			RGS1																												●
			RGS16								●				●															●	●					●													●
			RHBDF2												●																					●
			RHOA																																			●
			RHOB																			●								●									●	●			●						●
			RNH1								●																			●																			●
			RPL22										●																					●
			RPLP0										●																					●
			RPS10										●
			RPS2										●																					●
			RPS3										●
			RPS6KA5																								●
			RRAD																																	●				●
			RRM2B
			RRP12																		●																					●
			RRP8																																	●
			RTN3	●																●
			S100A10																																	●
			SAT1		●	●									●			●			●	●														●			●			●	●
			SCARB1																	●						●			●
			SCP2	●
			SDHD											●																					●
			SERBP1										●																					●
			SET										●																					●
			SFPQ						●																		●																			●
			SGMS2																												●
			SIK1															●																					●
			SLAMF1																												●
			SLC10A3
			SLC1A5	●							●	●								●										●			●								●								●
			SLC20A1																																								●
			SLC25A28																													●
			SLC25A37																									●																			●
			SLC2A3							●	●	●						●											●	●			●						●									●	●
			SLC2A8																							●
			SLC31A2																												●
			SLC3A2																																	●
			SLC4A1																									●																			●
			SLC66A3	●																●																					●
			SLC6A8																									●												●
			SLC7A1						●																		●																			●
			SLC7A5									●
			SMARCC1						●				●														●							●												●
			SMC1A					●	●																●		●																		●	●
			SMC3																																										●
			SNRPA																															●
			SNRPA1										●
			SNRPD3										●
			SOCS1																											●						●													●
			SPCS3																		●
			SPRY4																											●
			SQOR	●																●																					●
			SRP19																																							●
			SRPK1										●																					●
			SRSF1					●	●				●												●		●							●											●	●
			SS18						●																																					●
			STMN1					●	●																●		●																		●	●
			SURF1											●
			SUV39H1																																										●	●
			SYNCRIP
			TAF10
			TAF12																					●
			TAF13
			TARDBP										●																					●
			TCIRG1																																●
			TENT4A						●																		●
			TENT5C																									●
			TGFA												●																					●
			TGFBR3			●																●																					●
			TGIF1															●																				●	●
			TGM2																										●	●																		●	●
			THBD
			TIMM8B											●																					●
			TIMP1			●																●	●								●												●	●
			TIPARP							●								●											●										●									●
			TMEM9B																									●																			●
			TNC															●
			TNF			●												●				●																	●				●
			TNFAIP3							●								●											●										●									●
			TNFAIP6															●
			TNFSF9												●			●													●					●			●
			TOB1	●											●					●						●										●					●
			TOMM70
			TPI1							●		●
			TPSAB1																							●
			TRIB1															●																					●
			TRIM25																													●
			TRIM28
			TUBB																						●																				●
			TUBB2A															●																					●
			UBC	●																●																					●
			UBE2D3																														●					●
			UBR7																						●																				●
			UCK2								●
			UCP2	●																●								●													●						●
			UPP1												●																					●
			UQCR10	●										●
			VEGFA							●								●											●										●									●
			VPS37D																					●
			WARS1
			WEE1																			●
			WIPF1
			WSB1																										●																			●
			YPEL5																									●																			●
			YTHDC1						●																		●																			●
			ZFP36							●								●								●			●										●									●
			ZNF365												●																					●
			ZNF707																					●
[truncated: 8 more columns]

## Sheet: Table S7
				lnc-GSG1-1																lnc-KMT2E																		lnc-RGMA-1
				2	3	5	6	10	13	14	15	17	18	20	21	24	25	26	28	1	2	3	6	7	10	12	13	14	15	17	18	20	21	24	25	26	28	1	2	3	6	7	9	10	13	14	17	18	19
1	ADIPOGENESIS		ACAA1											●					●													●					●						●
2	ANDROGEN_RESPONSE		ADAM10
3	APOPTOSIS		ADCY6																				●																		●
4	CHOLESTEROL_HOMEOSTASIS		ADIPOR2																																												●
5	COAGULATION		ADRM1	●			●				●										●		●						●										●		●
6	DNA_REPAIR		AEN												●																		●
7	E2F_TARGETS		AGO4				●																●																		●
8	ESTROGEN_RESPONSE_LATE		AGRN
9	FATTY_ACID_METABOLISM		AHNAK							●																		●																		●
10	G2M_CHECKPOINT		AHR							●	●																	●	●																	●
11	GLYCOLYSIS		AIFM3		●																	●																		●
12	HEME_METABOLISM		AK3
13	HYPOXIA		ALDH3B1
14	IL2_STAT5_SIGNALING		ALDH9A1																																								●
15	INFLAMMATORY_RESPONSE		ALOX15B												●																		●
16	INTERFERON_GAMMA_RESPONSE		AMD1					●																	●																			●
17	MTORC1_SIGNALING		ANP32E
18	MYC_TARGETS_V1		ANXA1		●	●																●																		●
19	NOTCH_SIGNALING		ANXA2						●																		●																		●
20	OXIDATIVE_PHOSPHORYLATION		ANXA4							●																		●																		●
21	P53_PATHWAY		AP2M1
22	PI3K_AKT_MTOR_SIGNALING		AP2S1
23	PROTEIN_SECRETION		AP3S1
24	REACTIVE_OXYGEN_SPECIES_PATHWAY		APLP2
25	TGF_BETA_SIGNALING		ARAF																	●																		●
26	TNFA_SIGNALING_VIA_NFKB		ARID4B														●																		●
27	UNFOLDED_PROTEIN_RESPONSE		ARL4A							●										●								●										●								●
28	UV_RESPONSE_UP		ARPC5L																																												●
			ARRB2																●																		●
	correlated		ARTN
	anti-correlated		ASF1A
			ATF3		●				●						●			●	●			●					●						●			●	●			●					●
			ATP2A2																																												●
			ATP2B1								●							●											●							●
			ATP5MC1
			ATP5MF
			ATP5PB											●																		●
			ATP5PF											●																		●
			ATP6V0B											●																		●
			ATP6V1D																																												●
			B3GALT6
			BACH1																							●
			BAIAP2
			BCAM																				●																		●
			BCKDHA																																			●
			BCL2
			BCL2L11		●														●			●															●			●
			BHLHE40						●	●		●						●									●	●		●						●									●	●	●
			BIK																			●																		●
			BLVRB
			BMF		●
			BNIP3
			BNIP3L																																					●
			C3AR1								●																		●
			C8G			●
			CA2							●									●
			CA4
			CACYBP																											●																	●
			CANT1																				●																		●
			CASP1		●										●							●											●							●
			CASP2																																					●
			CASP8		●																	●																		●
			CASP9																																					●
			CBX5																					●																		●
			CCL24								●																		●
			CCL5								●							●											●							●
			CCL7
			CCNA1		●																	●																		●
			CCNE1																																											●
			CCNT1					●																	●																			●
			CCRL2
			CD274
			CD302																	●																		●
			CD55																										●
			CD69		●						●							●				●							●							●				●
			CD83							●								●										●								●										●
			CD86							●																		●																		●
			CD9
			CDC27					●																	●																			●
			CDC7																						●																			●
			CDKN1A		●				●		●	●			●			●				●					●		●	●			●			●				●					●		●
			CDKN2A												●																		●
			CDKN2C																	●																		●
			CEBPA												●																		●
			CEBPD															●																		●
			CFD			●
			CHAF1A					●
			CHCHD10																	●																		●
			CHST2
			CIDEA
			CITED2						●																		●																		●
			CLEC5A
			CLP1																				●																		●
			CLTB
			CNBP										●																		●
			COQ5																	●																		●
			CORO1A									●																																			●
			COX17				●							●									●									●									●
			COX5A																																													●
			COX6A1																																			●
			COX7A2
			COX7B											●						●												●						●
			COX8A																	●												●						●
			CREBBP																																					●
			CREG1																																		●
			CST7																									●																		●
			CTNS																							●
			CTPS1																																													●
			CTSB			●																				●
			CTSC									●																		●																	●
			CTSZ																																											●
			CUL1																						●						●													●				●	●
			CUL5					●																																				●
			CXCL1															●																		●
			CXCL12
			CXCL2															●	●																	●	●
			CXCL3															●																		●
			CXCL8								●																		●
			CYB5R3
			CYCS											●																		●
			CYLD																																					●
			DBI	●																	●																		●
			DCK																																							●
			DCN																																					●					●
			DDB1																				●																		●
			DDB2				●								●								●										●								●
			DDX18										●																		●																	●
			DGAT1
			DHRS3							●																		●																		●
			DKC1					●																	●																			●
			DNAJA1		●														●			●															●			●
			DNAJB1																●																		●
			DNAJC3		●																	●																		●
			DNM1L																																					●
			DONSON																					●																		●
			DTNA																																										●
			DUSP2															●																		●
			DUSP5															●																		●
			DUSP6			●
			EDF1
			EGR1															●																		●
			EHD1															●
			EIF1
			EIF1AX
			EIF2S1										●
			EIF3J										●																		●																	●
			EIF4EBP1
			EIF4G2																																													●
			ELL				●																●																		●
			ELOA																																						●
			ELOVL5																																												●
			EMP1		●					●												●						●												●						●
			ENDOD1
			ENPP1																																											●
			ERCC4																				●																		●
			ERRFI1
			ESRRA																	●																		●
			ETF1										●																		●									●							●	●
			EWSR1					●																	●																			●
			EXOSC1
			EXOSC7										●																		●																	●
			F2R																																					●
			F3			●			●		●							●									●		●							●									●
			FABP5
			FAM162A						●						●												●						●												●
			FANCC					●																	●																			●
			FAS		●										●							●											●							●
			FBXO6
			FBXW11																																														●
			FEN1																				●
			FOS						●						●			●	●																										●
			FOSL1																																	●
			FOXN3					●																	●																			●
			FTL																															●
			FTL													●
			FUT4															●																		●
			GADD45A																	●		●											●			●
			GADD45B		●					●								●				●						●								●				●						●
			GALC
			GALK1
			GALM							●																		●																		●
			GAPVD1																							●
			GBP6
			GLA									●																		●																	●
			GLRX5
			GLUD1											●																		●
			GLUL																																								●
			GM2A												●																		●
			GMPPA
			GMPR2																				●																		●
			GNPDA1
			GPAM																	●
			GPAT4																	●																		●
			GPER1
			GPR183
			GPX1		●																	●																		●
			GPX4																																			●		●	●					●
			GRPEL1											●					●	●												●					●	●
			GSN		●	●																●																		●
			GSR	●	●							●									●	●								●				●					●	●							●
			GSR													●
			GSTO1
			GTF2H5																																						●
			GUK1				●																●																		●
			GYS1
			H1-2												●																		●
			H2AX																●																		●
			H2AZ2					●																	●																			●
			H2BC12
			HAO2
			HCCS																													●											●
			HELZ2
			HERPUD1
			HEXA						●																		●																		●
			HEXIM1												●																		●
			HGF		●																	●																		●
			HK2						●	●		●															●	●		●															●	●	●
			HLA-B
			HMGB2		●																	●																		●
			HMGB3					●																●	●																	●		●
			HMOX2													●
			HNRNPA1										●																		●																	●
			HNRNPA2B1										●																																			●
			HNRNPA3										●																		●																	●
			HNRNPC										●																		●																	●
			HNRNPD					●					●											●	●						●											●		●				●
			HNRNPR										●																		●																	●
			HNRNPU
			HOMER1
			HOMER2	●																	●																		●
			HR
			HS6ST2
			HSP90AB1										●																		●																	●
			HSPA4																																												●
			HSPB1																			●																		●
			HSPB8																																			●
			HSPH1																																								●
			HTATIP2																							●
			HTR7
			ICAM4
			ICOSLG																										●							●
			ID2
			IDH3A																	●												●						●
			IDH3G																																			●					●
			IER2															●																		●
			IER3		●				●						●			●				●					●						●			●				●					●
			IER5												●			●															●			●
			IFI27
			IFI30									●			●															●			●														●
			IFIT2															●																		●
			IFRD1									●																		●																	●	●
			IGSF1
			IL10RA							●	●																	●	●																	●
			IL13RA1
			IL2RG
			ILF2										●																		●																	●
			ILF3					●																●	●																	●		●
			IMPA2
			INMT																																								●
			IPO7																					●																		●
			IRAK4
			IRF6
			IRS2						●									●									●									●									●
			ITGA7
			ITGB2																											●																	●
			ITGB4												●																		●
			ITGB7
			JMJD6						●																		●																		●
			JUN		●				●						●			●				●					●						●			●				●					●
			JUNB														●	●	●															●	●	●	●
			JUNB													●
			KLF6						●	●	●							●									●	●	●							●									●	●
			KLF9															●
			KLK8			●									●																		●
			KPNB1					●					●												●						●													●				●
			KRT17																														●
			KRT19																																				●
			KYNU															●																		●
			LAP3
			LDHA																																								●		●		●	●
			LGALS1																																								●
			LGALS3		●																	●																		●
			LHX9
			LIF																																											●
			LIG3
			LMNA		●																	●																		●
			LPAR1																										●
			LRRC8C							●																		●																		●
			LSM1
			LTA4H																																												●
			LUC7L3																					●																		●
			LY6E								●																		●
			MADD																																					●
			MAP2K3									●						●								●				●						●											●
			MAP3K20					●																	●																			●
			MAP3K8							●								●										●								●										●
			MAPK14					●																	●																			●
			MARCKS					●																	●																			●
			MCL1		●													●				●														●				●
			MDM2												●																		●
			ME2
			MEIS1					●																																				●
			MGST1
			MGST3											●						●						●						●						●
			MKNK1
			MOCOS
			MRAP
			MRPL40																																						●
			MRPS11
			MRPS12
			MRPS22											●																		●
			MTF2					●																	●																			●
			MXD1							●	●				●			●										●	●				●			●										●
			MYC							●	●							●										●	●							●										●		●
			MYD88
			MYL12A	●																	●																		●
			NABP1																	●																		●
			NAMPT								●	●						●											●	●						●											●
			NAP1L1										●											●							●
			NAT1																●																		●
			NCAN																																										●
			NDRG1	●					●	●					●						●						●	●					●						●						●	●
			NDUFA1
			NDUFB2											●																		●
			NDUFB3
			NDUFB7																																			●
			NDUFS7
			NDUFS8
			NDUFV3
			NEDD9																																					●
			NELFB				●																●																		●
			NFIL3						●	●		●						●									●	●		●						●									●	●	●
			NFKBIZ							●																		●																		●
			NFX1																				●																		●
			NIBAN1
			NLRP3								●																		●
			NME3				●
			NOCT						●																		●																		●
			NOP56																																													●
			NOTCH1																																														●
			NPM1										●																		●																	●
			NR4A2															●																		●
			NR4A3
			NRP1							●																		●																		●
			NSD2					●																	●																			●
			NT5C				●																●																		●
			NT5C3A																				●																		●
			NUDT21																				●	●																	●	●
			NUMA1
			NUP153																																							●
			NUP98					●																	●																			●
			OMD																																			●
			OSM
			P2RX4							●	●																	●	●																	●
			P2RY2								●																		●
			PAFAH1B1					●																	●																			●
			PCNA
			PDCD2L
			PDCD4																																					●
			PDE4B				●				●							●					●						●							●					●
			PDK1																								●			●
			PDS5B					●																●	●																	●		●
			PGAM1
			PGM2						●																		●																		●
			PHB																																													●
			PHGDH																																												●
			PHLDA1							●								●										●								●										●
			PIK3R3																																												●
			PLAU			●												●																		●
			PLAUR						●		●							●									●		●							●									●
			PLCB2																																					●
			PLEC							●																		●																		●
			PLEK			●												●																		●
			PLIN2						●	●										●							●	●										●							●	●
			PLK1
			PLK3												●																		●
			PLOD1
			PLOD2																																												●
			PMAIP1		●																	●																		●
			PML					●																	●																			●
			PMS2																					●																		●
			PNP				●			●		●											●					●		●											●					●	●
			POLE4																																						●
			POLH
			POLR2E				●																●																		●
			POLR2F
			POLR2G				●																●																		●
			POLR2K				●																																		●
			POLR3C																																						●
			POM121																				●																		●
			POP4
			PPIA
			PPIF																●																		●
			PPM1G										●																		●
			PPP1R15A						●			●			●		●	●									●			●			●		●	●									●		●
			PPP1R15B																	●																		●
			PPP3R1																																					●
			PPT1																																					●
			PRDX5
			PRPF4B					●																																				●
			PRPS1																					●																		●
			PSIP1																					●																		●
			PSMA4									●																																			●	●
			PSMB10
			PSMB2																												●																	●
			PSMB5																																												●
			PSMB9
			PSMC2																																												●
			PSMD1										●																		●																	●
			PSMD3										●
			PSMD8																																													●
			PTGER2							●	●																	●	●																	●
			PTGER4								●							●											●							●
			PTK2																																					●
			PTPN2
			PTS																																								●
			PYGL
			QSOX1
			RAB40C
			RAD23A																							●
			RAD51C
			RAE1																				●																		●
			RALA																				●																		●
			RER1
			RETN																																			●
			RGS1								●																		●
			RGS16							●	●				●													●	●				●													●
			RHBDF2												●																		●
			RHOA														●																		●
			RHOB		●					●								●	●			●						●								●	●			●						●
			RHOT2		●									●																										●
			RNH1							●																		●																		●
			ROS1
			RPL22										●																		●																	●
			RPL6
			RPLP0										●																		●																	●
			RPS10										●																		●																	●
			RPS2										●																		●																	●
			RPS3										●																		●																	●
			RPS6KA5																						●
			RRAD												●				●														●				●
			RRP12	●																	●																		●
			RRP9
			RSL1D1																												●
			RTN3																	●																		●
			S100A10																														●										●
			SAMHD1
			SAT1	●	●										●			●			●	●											●			●			●	●
			SBNO2
			SCAMP3
			SCARB1
			SCP2																																			●
			SDHD											●																		●											●
			SEC61A1																				●																		●
			SERBP1										●																		●																	●
			SET										●																		●																	●
			SF3A3																				●																		●
			SFPQ					●																	●																			●
			SGMS2								●																		●
			SIK1															●																		●
			SLAMF1								●																		●
			SLC10A3																							●
			SLC1A5							●		●								●								●		●								●								●	●
			SLC20A1																			●													●					●
			SLC25A37																							●
			SLC27A1																																			●
			SLC2A3						●	●		●						●									●	●		●						●									●	●	●
			SLC2A6
			SLC31A2								●																		●
			SLC3A2												●																		●
			SLC4A1																							●
			SLC66A3																	●																		●
			SLC7A1					●																	●																			●
			SLC7A5									●																																			●
			SMAD5																				●																		●
			SMARCC1					●					●												●						●													●				●
			SMC1A					●																●	●																	●		●
			SMC3
			SNAPC4
			SNN																																	●
			SNRPA1
			SNRPD3										●																																			●
			SNRPG																																													●
			SOCS1							●					●													●					●													●
			SOCS3																																	●
			SPCS1
			SPCS3	●																	●																		●
			SPP1
			SPRY4							●
			SQOR																	●																		●
			SRPK1										●																		●																	●
			SRSF1					●					●											●	●						●											●		●				●
			SRSF7																																													●
			SS18					●																																				●
			SSBP1
			ST14
			STAT2
			STC2
			STMN1					●																●	●																	●		●
			SULT2B1
			SURF1				●							●									●									●									●
			SUV39H1
			SYNCRIP																																													●
			TAF10				●																●																		●
			TAF12				●																●																		●
			TAF13				●																●																		●
			TAF9				●																●																		●
			TARDBP										●																		●																	●
			TATDN2
			TCF7L2																																														●
			TCIRG1											●																		●
			TENT4A					●																	●																			●
			TENT5C																							●
			TGFA												●																		●
			TGFBR3		●																	●																		●
			TGIF1														●	●																	●	●
			TGM2																								●	●																	●	●
			TIMM10
			TIMM50
			TIMM8B											●																		●
			TIMP1		●	●					●											●							●											●
			TIPARP						●									●									●									●									●
			TMED2																				●
			TMEM9B																							●
			TNC															●																		●
			TNF		●													●				●														●				●
			TNFAIP3						●									●									●									●									●
			TNFAIP6
			TNFRSF12A																																					●
			TNFSF10																																					●
			TNFSF11																																											●
			TNFSF9								●				●			●											●				●			●
			TOB1												●					●													●					●
			TOMM70																												●																	●
			TPI1																																										●		●
			TRIB1															●																		●
			TRIM26
			TRIM28																												●
			TUBB																					●																		●
			TUBB2A															●																		●
			UBC																	●																		●
			UBE2D3									●					●													●					●												●
			UBE2I																																				●
			UBR7																					●																		●
			UCK2
			UCP2																	●						●												●
			UPP1												●																		●
			USP11																				●																		●
			VAMP8
			VEGFA						●									●									●									●									●
			VPS37B																				●																		●
			VPS37D				●																●																		●
			VPS45
			WARS1									●																		●																	●
			WRAP73
			WSB1						●																		●																		●
			XPO1																																													●
			YIF1A
			YPEL5																							●
			YTHDC1					●																	●																			●
			ZBTB17
			ZFP36						●									●									●									●									●
			ZNF365												●																		●
			ZNF707				●																●																		●
[truncated: 70 more columns]
